# Supplementary material for: Construction of bispirooxindoles containing three quaternary stereocentres in a cascade using a single multifunctional organocatalyst
Source: Springer Nature journal article supplement (doi:10.1038/nchem.1039), 2011-05-05
Supplement: 41557_2011_BFnchem1039_MOESM37_ESM.mol [file 41557_2011_BFnchem1039_MOESM37_ESM.mol]

  ChemDraw04191107052D

 18 19  0  0  0  0  0  0  0  0999 V2000
   -1.7636   -0.0124    0.0000 C   0  0  0  0  0  0  0  0  0  0  0  0
   -1.7494   -0.8373    0.0000 C   0  0  0  0  0  0  0  0  0  0  0  0
   -1.0280   -1.2375    0.0000 C   0  0  0  0  0  0  0  0  0  0  0  0
   -0.3207   -0.8128    0.0000 C   0  0  0  0  0  0  0  0  0  0  0  0
   -0.3349    0.0121    0.0000 C   0  0  0  0  0  0  0  0  0  0  0  0
   -1.0563    0.4123    0.0000 C   0  0  0  0  0  0  0  0  0  0  0  0
    0.9416   -0.3786    0.0000 C   0  0  0  0  0  0  0  0  0  0  0  0
    0.4453    0.2804    0.0000 C   0  0  0  0  0  0  0  0  0  0  0  0
    1.7636   -0.3645    0.0000 O   0  0  0  0  0  0  0  0  0  0  0  0
    0.6859    1.0666    0.0000 C   0  0  0  0  0  0  0  0  0  0  0  0
    0.4682   -1.0543    0.0000 N   0  0  0  0  0  0  0  0  0  0  0  0
    0.1960   -2.4521    0.0000 O   0  0  0  0  0  0  0  0  0  0  0  0
    0.7356   -1.8318    0.0000 C   0  0  0  0  0  0  0  0  0  0  0  0
    1.5427   -1.9889    0.0000 C   0  0  0  0  0  0  0  0  0  0  0  0
    0.1273    1.6659    0.0000 C   0  0  0  0  0  0  0  0  0  0  0  0
    0.3680    2.4521    0.0000 O   0  0  0  0  0  0  0  0  0  0  0  0
   -0.6739    1.4812    0.0000 O   0  0  0  0  0  0  0  0  0  0  0  0
   -1.2553    2.0626    0.0000 C   0  0  0  0  0  0  0  0  0  0  0  0
  1  2  2  0      
  2  3  1  0      
  3  4  2  0      
  4  5  1  0      
  5  6  2  0      
  6  1  1  0      
  4 11  1  0      
 11  7  1  0      
  7  8  1  0      
  8  5  1  0      
  7  9  2  0      
  8 10  2  0      
 10 15  1  0      
 11 13  1  0      
 12 13  2  0      
 13 14  1  0      
 15 16  2  0      
 15 17  1  0      
 17 18  1  0      
M  END
