# Supplementary material for: Construction of bispirooxindoles containing three quaternary stereocentres in a cascade using a single multifunctional organocatalyst
Source: Springer Nature journal article supplement (doi:10.1038/nchem.1039), 2011-05-05
Supplement: 41557_2011_BFnchem1039_MOESM41_ESM.mol [file 41557_2011_BFnchem1039_MOESM41_ESM.mol]

  ChemDraw04191107052D

 23 25  0  0  0  0  0  0  0  0999 V2000
   -1.7604   -1.1689    0.0000 C   0  0  0  0  0  0  0  0  0  0  0  0
   -1.7604   -1.9939    0.0000 C   0  0  0  0  0  0  0  0  0  0  0  0
   -1.0459   -2.4064    0.0000 C   0  0  0  0  0  0  0  0  0  0  0  0
   -0.3314   -1.9939    0.0000 C   0  0  0  0  0  0  0  0  0  0  0  0
   -0.3314   -1.1689    0.0000 C   0  0  0  0  0  0  0  0  0  0  0  0
   -1.0459   -0.7564    0.0000 C   0  0  0  0  0  0  0  0  0  0  0  0
    0.9381   -1.5814    0.0000 C   0  0  0  0  0  0  0  0  0  0  0  0
    0.4532   -0.9140    0.0000 C   0  0  0  0  0  0  0  0  0  0  0  0
    0.7073   -0.1320    0.0000 C   0  0  0  0  0  0  0  0  0  0  0  0
    0.1571    0.4790    0.0000 C   0  0  0  0  0  0  0  0  0  0  0  0
   -0.6471    0.3081    0.0000 O   0  0  0  0  0  0  0  0  0  0  0  0
    0.4112    1.2610    0.0000 C   0  0  0  0  0  0  0  0  0  0  0  0
    1.2182    1.4325    0.0000 C   0  0  0  0  0  0  0  0  0  0  0  0
    1.4731    2.2172    0.0000 C   0  0  0  0  0  0  0  0  0  0  0  0
    0.9211    2.8303    0.0000 C   0  0  0  0  0  0  0  0  0  0  0  0
    0.1141    2.6587    0.0000 C   0  0  0  0  0  0  0  0  0  0  0  0
   -0.1408    1.8741    0.0000 C   0  0  0  0  0  0  0  0  0  0  0  0
    1.7604   -1.5814    0.0000 O   0  0  0  0  0  0  0  0  0  0  0  0
    1.1752    3.6122    0.0000 Cl  0  0  0  0  0  0  0  0  0  0  0  0
    0.4532   -2.2489    0.0000 N   0  0  0  0  0  0  0  0  0  0  0  0
    0.1259   -3.6122    0.0000 O   0  0  0  0  0  0  0  0  0  0  0  0
    0.7073   -3.0308    0.0000 C   0  0  0  0  0  0  0  0  0  0  0  0
    1.5015   -3.2436    0.0000 C   0  0  0  0  0  0  0  0  0  0  0  0
  1  2  2  0      
  2  3  1  0      
  3  4  2  0      
  4  5  1  0      
  5  6  2  0      
  6  1  1  0      
  4 20  1  0      
 20  7  1  0      
  7  8  1  0      
  8  5  1  0      
  8  9  2  0      
  9 10  1  0      
 10 11  2  0      
 10 12  1  0      
 12 13  2  0      
 13 14  1  0      
 14 15  2  0      
 15 16  1  0      
 16 17  2  0      
 17 12  1  0      
  7 18  2  0      
 15 19  1  0      
 20 22  1  0      
 21 22  2  0      
 22 23  1  0      
M  END
