# Supplementary material for: Construction of bispirooxindoles containing three quaternary stereocentres in a cascade using a single multifunctional organocatalyst
Source: Springer Nature journal article supplement (doi:10.1038/nchem.1039), 2011-05-05
Supplement: 41557_2011_BFnchem1039_MOESM47_ESM.mol [file 41557_2011_BFnchem1039_MOESM47_ESM.mol]

  ChemDraw04191107052D

 19 20  0  0  0  0  0  0  0  0999 V2000
   -1.4182   -0.0124    0.0000 C   0  0  0  0  0  0  0  0  0  0  0  0
   -1.4041   -0.8373    0.0000 C   0  0  0  0  0  0  0  0  0  0  0  0
   -0.6826   -1.2375    0.0000 C   0  0  0  0  0  0  0  0  0  0  0  0
    0.0247   -0.8128    0.0000 C   0  0  0  0  0  0  0  0  0  0  0  0
    0.0105    0.0121    0.0000 C   0  0  0  0  0  0  0  0  0  0  0  0
   -0.7109    0.4123    0.0000 C   0  0  0  0  0  0  0  0  0  0  0  0
    1.2870   -0.3786    0.0000 C   0  0  0  0  0  0  0  0  0  0  0  0
    0.7907    0.2804    0.0000 C   0  0  0  0  0  0  0  0  0  0  0  0
    2.1090   -0.3645    0.0000 O   0  0  0  0  0  0  0  0  0  0  0  0
    1.0313    1.0666    0.0000 C   0  0  0  0  0  0  0  0  0  0  0  0
   -2.1090   -1.2606    0.0000 Cl  0  0  0  0  0  0  0  0  0  0  0  0
    0.8136   -1.0543    0.0000 N   0  0  0  0  0  0  0  0  0  0  0  0
    0.5414   -2.4521    0.0000 O   0  0  0  0  0  0  0  0  0  0  0  0
    1.0810   -1.8318    0.0000 C   0  0  0  0  0  0  0  0  0  0  0  0
    1.8881   -1.9889    0.0000 C   0  0  0  0  0  0  0  0  0  0  0  0
    0.4727    1.6659    0.0000 C   0  0  0  0  0  0  0  0  0  0  0  0
    0.7133    2.4521    0.0000 O   0  0  0  0  0  0  0  0  0  0  0  0
   -0.3285    1.4812    0.0000 O   0  0  0  0  0  0  0  0  0  0  0  0
   -0.9099    2.0626    0.0000 C   0  0  0  0  0  0  0  0  0  0  0  0
  1  2  2  0      
  2  3  1  0      
  3  4  2  0      
  4  5  1  0      
  5  6  2  0      
  6  1  1  0      
  4 12  1  0      
 12  7  1  0      
  7  8  1  0      
  8  5  1  0      
  7  9  2  0      
  8 10  2  0      
 10 16  1  0      
  2 11  1  0      
 12 14  1  0      
 13 14  2  0      
 14 15  1  0      
 16 17  2  0      
 16 18  1  0      
 18 19  1  0      
M  END
