# Supplementary material for: Construction of bispirooxindoles containing three quaternary stereocentres in a cascade using a single multifunctional organocatalyst
Source: Springer Nature journal article supplement (doi:10.1038/nchem.1039), 2011-05-05
Supplement: 41557_2011_BFnchem1039_MOESM53_ESM.mol [file 41557_2011_BFnchem1039_MOESM53_ESM.mol]

  ChemDraw04191107052D

 44 50  0  0  0  0  0  0  0  0999 V2000
   -2.0132   -0.6603    0.0000 C   0  0  0  0  0  0  0  0  0  0  0  0
   -2.0110   -1.4853    0.0000 C   0  0  0  0  0  0  0  0  0  0  0  0
   -1.2954   -1.8959    0.0000 C   0  0  0  0  0  0  0  0  0  0  0  0
   -0.5820   -1.4815    0.0000 C   0  0  0  0  0  0  0  0  0  0  0  0
   -0.5843   -0.6565    0.0000 C   0  0  0  0  0  0  0  0  0  0  0  0
   -1.2998   -0.2459    0.0000 C   0  0  0  0  0  0  0  0  0  0  0  0
    0.6864   -1.0655    0.0000 C   0  0  0  0  0  0  0  0  0  0  0  0
    0.1997   -0.3994    0.0000 C   0  0  0  0  0  0  0  0  0  0  0  0
    1.5114   -1.0633    0.0000 O   0  0  0  0  0  0  0  0  0  0  0  0
    0.9836   -0.1423    0.0000 C   0  0  0  0  0  0  0  0  0  0  0  0
    0.9814    0.6827    0.0000 C   0  0  0  0  0  0  0  0  0  0  0  0
    0.1961    0.9355    0.0000 C   0  0  0  0  0  0  0  0  0  0  0  0
   -0.2870    0.2667    0.0000 C   0  0  0  0  0  0  0  0  0  0  0  0
    1.6432    0.2250    0.0000 C   0  0  0  0  0  0  0  0  0  0  0  0
    1.8336    1.0283    0.0000 O   0  0  0  0  0  0  0  0  0  0  0  0
    0.6792    1.6042    0.0000 C   0  0  0  0  0  0  0  0  0  0  0  0
   -0.5915    2.0133    0.0000 C   0  0  0  0  0  0  0  0  0  0  0  0
   -0.5892    1.1883    0.0000 C   0  0  0  0  0  0  0  0  0  0  0  0
   -1.3070    2.4239    0.0000 C   0  0  0  0  0  0  0  0  0  0  0  0
   -2.0204    2.0094    0.0000 C   0  0  0  0  0  0  0  0  0  0  0  0
   -2.0182    1.1844    0.0000 C   0  0  0  0  0  0  0  0  0  0  0  0
   -1.3026    0.7739    0.0000 C   0  0  0  0  0  0  0  0  0  0  0  0
    1.5362    1.6209    0.0000 O   0  0  0  0  0  0  0  0  0  0  0  0
   -1.8569    0.2358    0.0000 C   0  0  0  0  0  0  0  0  0  0  0  0
    1.6757   -0.5965    0.0000 C   0  0  0  0  0  0  0  0  0  0  0  0
    2.4034   -0.9790    0.0000 C   0  0  0  0  0  0  0  0  0  0  0  0
    3.0986   -0.5401    0.0000 C   0  0  0  0  0  0  0  0  0  0  0  0
    3.0661    0.2814    0.0000 C   0  0  0  0  0  0  0  0  0  0  0  0
    2.3384    0.6640    0.0000 C   0  0  0  0  0  0  0  0  0  0  0  0
    0.1925    2.2703    0.0000 N   0  0  0  0  0  0  0  0  0  0  0  0
    1.2482    3.2261    0.0000 O   0  0  0  0  0  0  0  0  0  0  0  0
    0.4444    3.0530    0.0000 C   0  0  0  0  0  0  0  0  0  0  0  0
   -0.1370    3.6344    0.0000 C   0  0  0  0  0  0  0  0  0  0  0  0
    0.2033   -1.7343    0.0000 N   0  0  0  0  0  0  0  0  0  0  0  0
    1.2642   -2.6843    0.0000 C   0  0  0  0  0  0  0  0  0  0  0  0
    1.5204   -3.4656    0.0000 C   0  0  0  0  0  0  0  0  0  0  0  0
    2.3251   -3.6344    0.0000 C   0  0  0  0  0  0  0  0  0  0  0  0
    2.8736   -3.0219    0.0000 C   0  0  0  0  0  0  0  0  0  0  0  0
    2.6174   -2.2406    0.0000 C   0  0  0  0  0  0  0  0  0  0  0  0
    1.8127   -2.0718    0.0000 C   0  0  0  0  0  0  0  0  0  0  0  0
    0.4595   -2.5156    0.0000 C   0  0  0  0  0  0  0  0  0  0  0  0
   -2.2764   -0.4713    0.0000 O   0  0  0  0  0  0  0  0  0  0  0  0
   -2.2596    0.9527    0.0000 O   0  0  0  0  0  0  0  0  0  0  0  0
   -3.0986   -0.4615    0.0000 C   0  0  0  0  0  0  0  0  0  0  0  0
  1  2  2  0      
  2  3  1  0      
  3  4  2  0      
  4  5  1  0      
  5  6  2  0      
  6  1  1  0      
  4 34  1  0      
 34  7  1  0      
  8  7  1  6      
  8  5  1  1      
  7  9  2  0      
  8 10  1  0      
 10 11  1  0      
 12 13  1  0      
 11 14  1  1      
 11 15  1  6      
 12 16  1  1      
 16 30  1  0      
 30 17  1  0      
 17 18  2  0      
 12 18  1  6      
 17 19  1  0      
 19 20  2  0      
 20 21  1  0      
 21 22  2  0      
 22 18  1  0      
 16 23  2  0      
 13 24  1  1      
 14 25  2  0      
 25 26  1  0      
 26 27  2  0      
 27 28  1  0      
 28 29  2  0      
 29 14  1  0      
 11 12  1  0      
 13  8  1  0      
 30 32  1  0      
 31 32  2  0      
 32 33  1  0      
 34 41  1  0      
 35 36  2  0      
 36 37  1  0      
 37 38  2  0      
 38 39  1  0      
 39 40  2  0      
 35 40  1  0      
 35 41  1  0      
 24 42  1  0      
 24 43  2  0      
 42 44  1  0      
M  END
